# Supplementary material
Source: MDPI journal article supplement (https://www.mdpi.com/1999-4907/15/5/826)
Supplement: s1 [file s1]

**Supplementary material for:**

**Hydrological Variability in the El Cielo Biosphere Reserve, Mexico: A Watershed-Scale Analysis using tree-ring records**

**Table S1.** Testing of statistical model assumptions of linear regression models

| Gauge station | Heteroscedasticity <sup>1</sup> | Normality <sup>2</sup> | VIF <sup>3</sup> |
|---------------|---------------------------------|------------------------|------------------|
| Ahualulco     | p = 0.977                       | p = 0.097              | < 5.53           |
| Encantada     | p = 0.824                       | p = 0.841              | < 6.28           |
| Frio          | p = 0.062                       | p = 0.074              | < 3.22           |
| Gabriel       | p = 0.053                       | p = 0.050              | < 1.95           |
| Sabinas       | p = 0.800                       | p = 0.063              | < 3.25           |
| Servilleta    | p = 0.010                       | p = 0.145              | < 1.70           |
| Tamesi        | p = 0.251                       | p = 0.263              | < 9.15           |

<sup>1</sup>Significance testing for linear regression models assumes that the residuals have constant variance; <sup>2</sup>Check model for normality of residuals; <sup>3</sup>Test regression models for multicollinearity by calculating the variance inflation factor. When VIF > 10 variables are correlated.

**Table S2.** Verification statistics in the calibration and verification periods within The El Cielo Biosphere Reserve (CBR)

| Gauge station | Period       | Range     | RE <sup>1</sup> | ST <sup>2</sup> | R <sup>2</sup> | R <sup>2</sup> <sub>adjusted</sub> | Pearson correlation |
|---------------|--------------|-----------|-----------------|-----------------|----------------|------------------------------------|---------------------|
| Ahualulco     | Calibration  | 1946-1979 | 0.349           | 34              | 0.35           | 0.26                               | 0.591               |
|               | Verification | 1980-2014 | 0.211           | 35              | 0.211          | 0.112                              | 0.463               |
| Encantada     | Calibration  | 1949-1981 | 0.554           | 33              | 0.554          | 0.452                              | 0.745               |
|               | Verification | 1982-2014 | 0.486           | 33              | 0.486          | 0.368                              | 0.697               |
| Frio          | Calibration  | 1960-1977 | 0.716           | 17              | 0.716          | 0.561                              | 0.846               |
|               | Verification | 1978-1995 | 0.586           | 17              | 0.586          | 0.356                              | 0.765               |
| Gabriel       | Calibration  | 1984-1998 | 0.494           | 15              | 0.494          | 0.356                              | 0.703               |
|               | Verification | 1999-2014 | 0.234           | 16              | 0.234          | 0.056                              | 0.484               |
| Sabinas       | Calibration  | 1960-1977 | 0.742           | 17              | 0.742          | 0.562                              | 0.862               |
|               | Verification | 1978-1995 | 0.58            | 17              | 0.58           | 0.286                              | 0.762               |
| Servilleta    | Calibration  | 1966-1989 | 0.335           | 22              | 0.335          | 0.235                              | 0.579               |
|               | Verification | 1990-2014 | 0.447           | 23              | 0.447          | 0.368                              | 0.669               |
| Tamesi        | Calibration  | 1973-1988 | 0.238           | 16              | 0.238          | 0.067                              | 0.487               |
|               | Verification | 1989-2004 | 0.321           | 13              | 0.321          | 0.094                              | 0.566               |

<sup>1</sup> RE = Reduction of error (positive values indicate that the model has predictive skills); <sup>2</sup> ST = Sign test (relates the number of agreements and disagreements between the observed and reconstructed).

**Table S3.** Correlation coefficient between reconstructed runoff and seasonal precipitation. \*  $p < 0.05$

| Gauge station | Winter precipitation | Spring precipitation | Summer precipitation | Autum precipitation | Winter + Spring |
|---------------|----------------------|----------------------|----------------------|---------------------|-----------------|
| Zapata        | 0.04                 | 0.17                 | 0.03                 | 0.00                | 0.16            |
| Servilleta    | <b>0.44*</b>         | <b>0.49*</b>         | -0.04                | 0.03                | <b>0.56*</b>    |
| Ahualulco     | <b>0.34*</b>         | <b>0.25*</b>         | 0.04                 | 0.05                | <b>0.33*</b>    |
| Encantada     | <b>0.22*</b>         | <b>0.22*</b>         | -0.07                | 0.00                | <b>0.26*</b>    |
| Sabinas       | 0.19                 | <b>0.28*</b>         | 0.11                 | -0.06               | <b>0.31*</b>    |
| Frio          | 0.04                 | <b>0.28*</b>         | 0.11                 | 0.01                | <b>0.25*</b>    |
| Gabriel       | <b>0.44*</b>         | <b>0.45*</b>         | -0.04                | 0.02                | <b>0.52*</b>    |
| Tamesi        | <b>0.31*</b>         | <b>0.34*</b>         | 0.09                 | 0.08                | <b>0.40*</b>    |

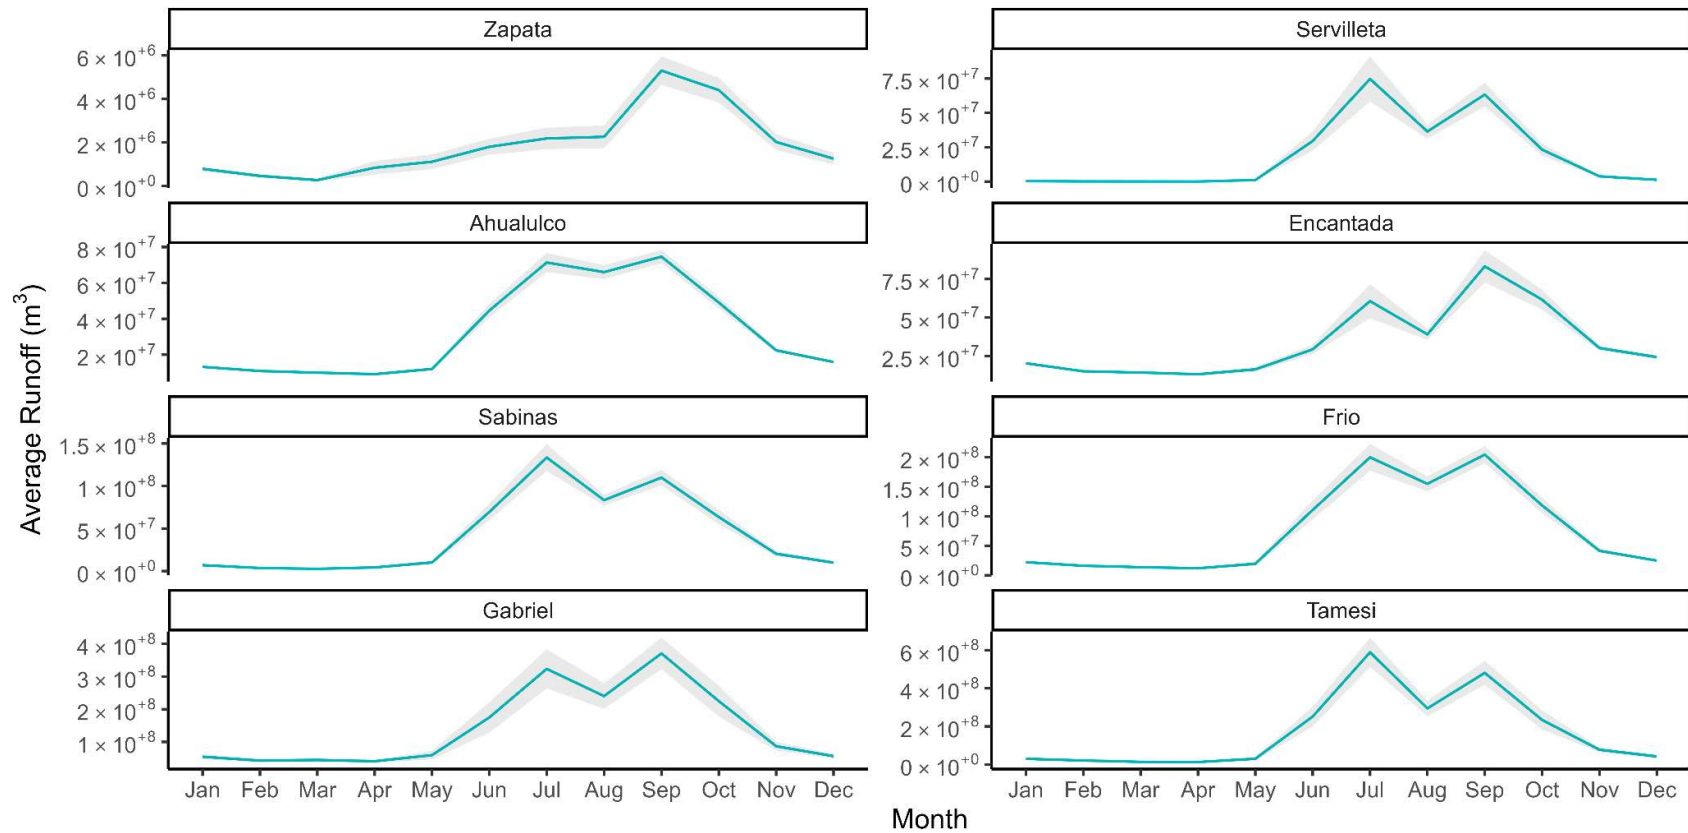

**Figure S1.** Monthly average runoff for the gauge stations. Note that May represents the beginning of the high runoff volume, which lasts until around November. Most gauge stations show a decline in runoff volume in August, mainly associated with the midsummer drought.
